# Supplementary material
Source: Royal Society of Chemistry journal article supplement (doi:10.1039/d6nj00456c)
Supplement: d6nj00456c1.pdf [file d6nj00456c1.pdf]

# Carbon-encapsulated hierarchical TS-1 zeolites with enhanced hydrophobicity and catalytic epoxidation performance

Yining Chen<sup>‡a</sup>, Fangna Shangguan<sup>‡a</sup>, Weilong Chun<sup>a</sup>, Lijia Li<sup>a</sup>, Xin Yang<sup>a</sup>, Jiale Qi<sup>a</sup>, Yujing Xun<sup>a</sup>  
and Huiyong Chen<sup>\*ab</sup>

<sup>a</sup> School of Chemical Engineering, Northwest University, Xi'an, Shaanxi 710069, China.

<sup>b</sup> International Science & Technology Cooperation Base for Clean Utilization of Hydrocarbon Resources, Chemical Engineering Research Center of the Ministry of Education for Advanced Use Technology of Shanbei Energy, Collaborative Innovation Center for Development of Energy and Chemical Industry in Northern Shaanxi, Northwest University, Xi'an, Shaanxi 710069, China.

\* Corresponding authors:

Prof. Huiyong Chen

Phone: (+86) 150 2993 2016

E-mail: [hychen@nwu.edu.cn](mailto:hychen@nwu.edu.cn)

<sup>‡</sup> Yining Chen and Fangna Shangguan contributed equally to this work.

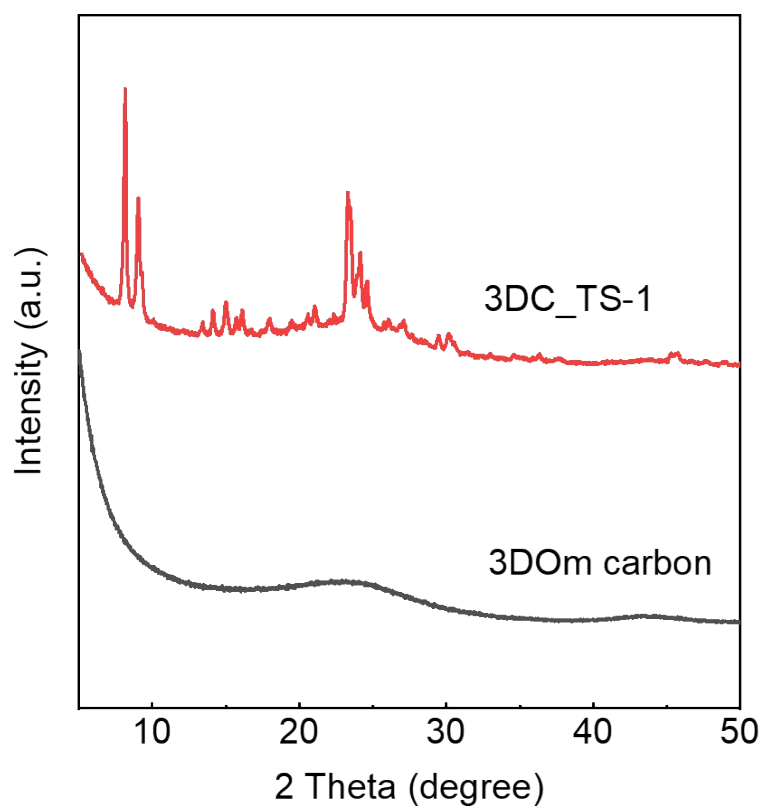

Fig. S1 XRD patterns of the 3DC\_TS-1 and 3DOm carbon.

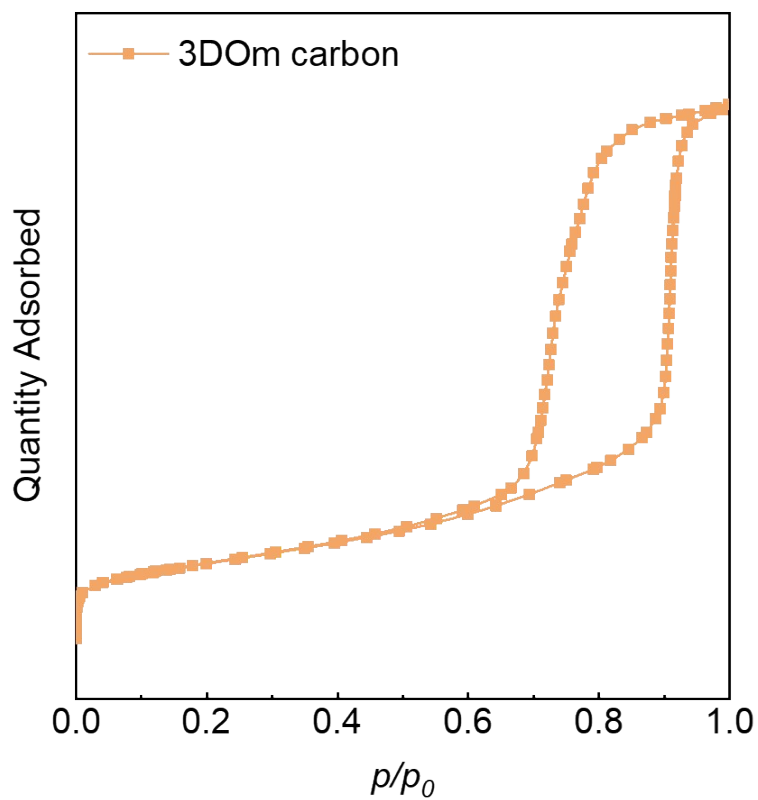

Fig. S2 N<sub>2</sub> adsorption-desorption isotherm of 3DOm carbon.

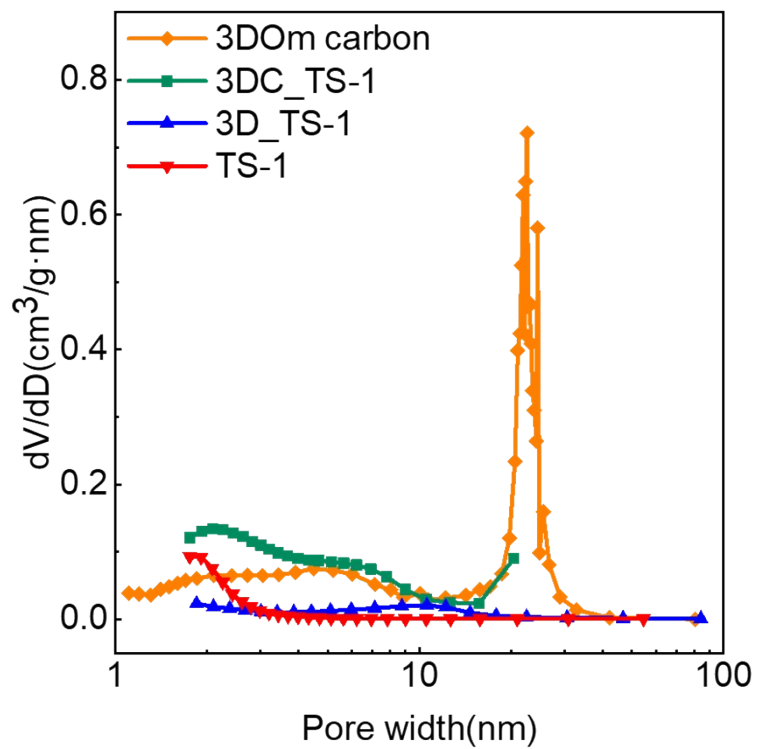

Fig. S3 BJH pore size distributions of 3DOm carbon and various titanasilicate zeolites.

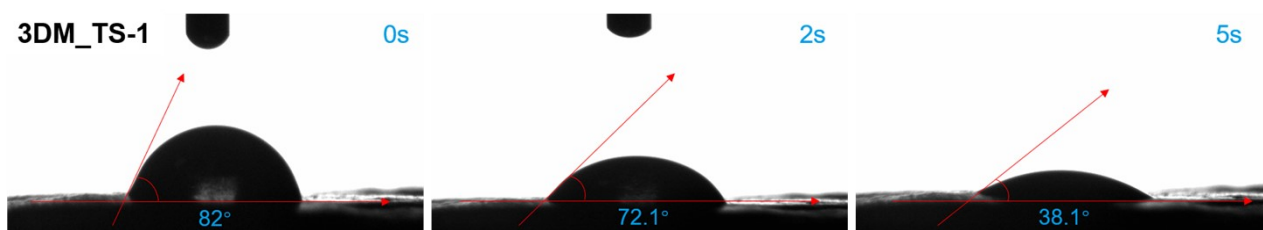

Fig. S4 Water contact angles of 3DM\_TS-1.

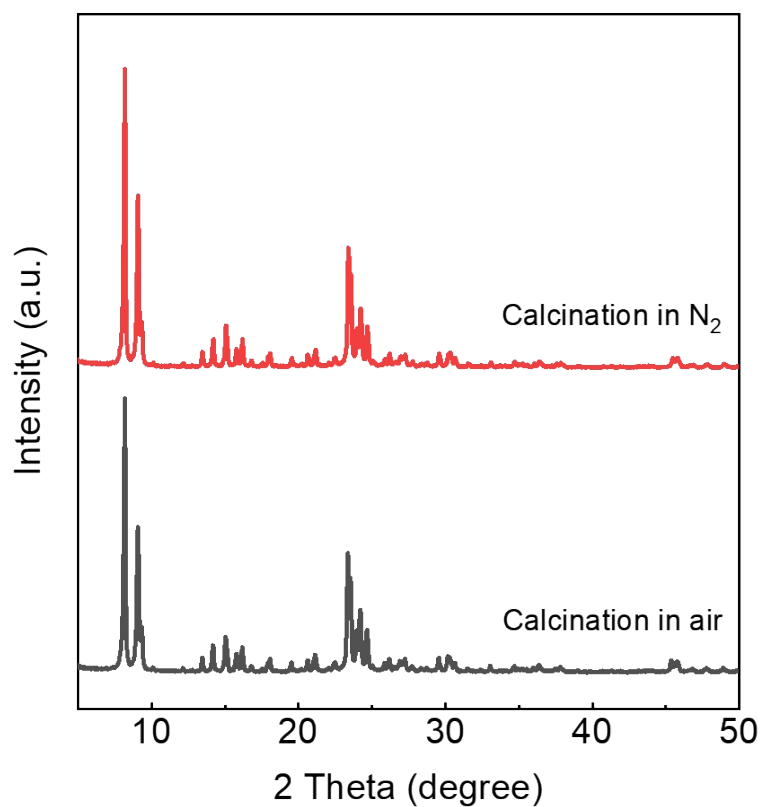

Fig. S5 XRD patterns of the conventional TS-1 calcined in air and  $N_2$ , respectively.

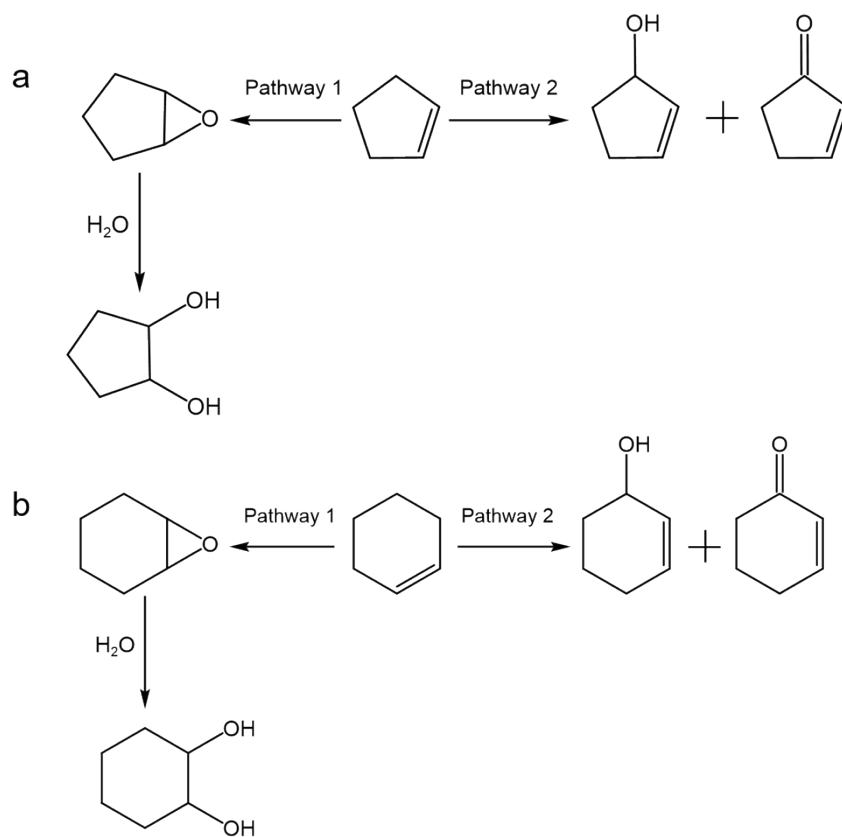

Fig. S6 Cyclopentene and cyclohexene conversion through (1) epoxidation pathway and (2) allylic oxidation pathway.

Table S1 Catalytic performance of TS-1, 3D\_TS-1, 3DC\_TS-1 in cyclopentene epoxidation with H<sub>2</sub>O<sub>2</sub><sup>a</sup>

| Catalysts         | Ti content <sup>b</sup><br>( $\mu\text{mol}\cdot\text{g}^{-1}$ ) | Con. (%) | Sel. <sup>c</sup> (%) |      |        | TOF<br>(h <sup>-1</sup> ) | Yield<br>(%) |
|-------------------|------------------------------------------------------------------|----------|-----------------------|------|--------|---------------------------|--------------|
|                   |                                                                  |          | Epoxide               | Diol | Others |                           |              |
| TS-1 <sup>d</sup> | 194.9                                                            | 14.4     | 86.2                  | 9.2  | 4.6    | 74                        | 12.4         |
| TS-1 <sup>e</sup> | -                                                                | 12.3     | 90.0                  | 1.5  | 8.5    | -                         | 12.0         |
| 3D_TS-1           | 376.4                                                            | 14.0     | 84.1                  | 1.6  | 14.3   | 37                        | 11.8         |
| 3DC_TS-1          | 106.7                                                            | 10.3     | 97.3                  | 0.7  | 2.0    | 97                        | 10.0         |

<sup>a</sup> Reaction condition: 10 mmol cyclopentene, 50 mg catalyst, 10 mmol H<sub>2</sub>O<sub>2</sub> (30 wt%) as oxidant, 10 ml CH<sub>3</sub>CN as solvent, 60 °C, 2 h.

<sup>b</sup> Detected by ICP-OES.

<sup>c</sup> Epoxide: 1,2-epoxycyclopentane. Diol: 1,2-cyclopentandiol. Others: cyclopentene-1-one and 2-cyclopenten-1-ol.

<sup>d</sup> Calcined in air.

<sup>e</sup> Calcined in N<sub>2</sub>.

Table S2 Catalytic performance of TS-1, 3D\_TS-1, 3DC\_TS-1 in cyclohexene epoxidation with H<sub>2</sub>O<sub>2</sub><sup>a</sup>

| Catalysts | Ti content <sup>b</sup><br>( $\mu\text{mol}\cdot\text{g}^{-1}$ ) | Con. (%) | Sel. <sup>c</sup> (%) |      |        | TOF<br>(h <sup>-1</sup> ) | Yield<br>(%) |
|-----------|------------------------------------------------------------------|----------|-----------------------|------|--------|---------------------------|--------------|
|           |                                                                  |          | Epoxide               | Diol | Others |                           |              |
| TS-1      | 194.9                                                            | 1.6      | 38.9                  | 45.3 | 15.8   | 8                         | 0.6          |
| 3D_TS-1   | 376.4                                                            | 1.7      | 28.8                  | 56.7 | 14.5   | 5                         | 0.5          |
| 3DC_TS-1  | 106.7                                                            | 0.8      | 77.3                  | 20.1 | 2.6    | 8                         | 0.7          |

<sup>a</sup> Reaction condition: 10 mmol cyclohexene, 50 mg catalyst, 10 mmol H<sub>2</sub>O<sub>2</sub> (30 wt%) as oxidant, 10 ml CH<sub>3</sub>CN as solvent, 60 °C, 2 h.

<sup>b</sup> Detected by ICP-OES.

<sup>c</sup> Epoxide: 1,2-epoxycyclohexane. Diol: 1,2-cyclohexanediol. Others: cyclohexen-1-one and 2-cyclohexe-1-ol.

Table S3 Catalytic performance of 3DC\_TS-1 and 3DM\_TS-1 in cyclopentene and cyclohexene epoxidation with H<sub>2</sub>O<sub>2</sub> <sup>a</sup>

| Catalysts | Cyclopentene |                       |      |        |           | Cyclohexene |                       |      |        |                        |
|-----------|--------------|-----------------------|------|--------|-----------|-------------|-----------------------|------|--------|------------------------|
|           | Con. (%)     | Sel. <sup>b</sup> (%) |      |        | Yield (%) | Con. (%)    | Sel. <sup>c</sup> (%) |      |        | Yield <sup>d</sup> (%) |
|           |              | Epoxide               | Diol | Others |           |             | Epoxide               | Diol | Others |                        |
| 3DC_TS-1  | 10.3         | 97.3                  | 0.7  | 2      | 10.0      | 0.8         | 77.3                  | 20.1 | 2.6    | 0.7                    |
| 3DM_TS-1  | 10.9         | 86.0                  | 9.3  | 4.7    | 9.4       | 0.9         | 38.4                  | 46.7 | 14.9   | 0.4                    |

<sup>a</sup> Reaction condition: 10 mmol cyclohexene, 50 mg catalyst, 10 mmol H<sub>2</sub>O<sub>2</sub> (30 wt%) as oxidant, 10 ml CH<sub>3</sub>CN as solvent, 60 °C, 2 h.

<sup>b</sup> Epoxide: 1,2-epoxycyclopentane. Diol: 1,2-cyclopentandiol. Others: cyclopentene-1-one and 2-cyclopenten-1-ol.

<sup>c</sup> Epoxide: 1,2-epoxycyclohexane. Diol: 1,2-cyclohexanediol. Others: cyclohexen-1-one and 2-cyclohexe-1-ol.

Table S4 Cyclopentene epoxidation performance of 3D\_TS-1 before and after toxification <sup>a</sup>

| Catalysts    | Sel. <sup>b</sup> (%) |      |        | Yield (%) |
|--------------|-----------------------|------|--------|-----------|
|              | Epoxide               | Diol | Others |           |
| 3D_TS-1      | 84.1                  | 1.6  | 14.3   | 11.8      |
| 3D_TS-1(PPA) | 83.1                  | 1.4  | 15.5   | 5.2       |

<sup>a</sup> The poisoning of the sample was conducted by adding 10 mmol of phenylphosphonic acid (PPA) into the reaction mixture.

<sup>b</sup> Epoxide: 1,2-Epoxycyclopentane. Diol: 1,2-Cyclopentandiol. Others: cyclopentene-1-one and 2-cyclopenten-1-ol.

Table S5 Recyclability of 3DC\_TS-1 and 3D\_TS-1 in cyclopentene epoxidation <sup>a</sup>

| Run number | 3DC_TS-1  |                       | 3D_TS-1   |                       |
|------------|-----------|-----------------------|-----------|-----------------------|
|            | Yield (%) | Sel. <sup>c</sup> (%) | Yield (%) | Sel. <sup>c</sup> (%) |
| 1          | 10.0      | 97.3                  | 11.8      | 84.1                  |
| 2          | 7.1       | 97.0                  | 8.3       | 83.4                  |
| 3          | 4.5       | 96.4                  | 6.1       | 82.5                  |
| 4          | 9.6       | 97.7                  | 11.7      | 85.1                  |

<sup>a</sup> Reaction conditions: 50 mg catalyst, 10 mmol cyclopentene, 10 ml CH<sub>3</sub>CN, 10 mmol H<sub>2</sub>O<sub>2</sub> (30 wt%), 60 °C, 2 h.

<sup>b</sup> After the first three runs, the used catalysts were collected by filtration, simply washed by acetonitrile and then carried on the next run of reaction. After the three run, the used catalysts were calcined in nitrogen or air at 773 K for 6 h.

<sup>c</sup> Selectivity of epoxy cyclopentane.
